# Supplementary material for: Determination of mercury in aquatic systems by DGT device using thiol-modified carbon nanoparticle suspension as the liquid binding phase
Source: Royal Society of Chemistry journal article supplement (doi:10.1039/c7nj02007d), 2017-01-01
Supplement: c7nj02007d1.pdf [file c7nj02007d1.pdf]

## Electronic Supplementary Information (ESI)

### **Determination of mercury in aquatic systems by DGT device using thiol-modified carbon nanoparticles suspension as the liquid binding phase**

Tianxing Wu,<sup>a</sup> Guozhong Wang,<sup>\*a</sup> Yunxia Zhang,<sup>a</sup> Mingguang Kong<sup>a</sup> and Huijun

Zhao<sup>\*a,b</sup>

<sup>a</sup> Key Laboratory of Materials Physics, Centre for Environmental and Energy Nanomaterials, Anhui Key Laboratory of Nanomaterials and Nanostructures, CAS Center for Excellence in Nanoscience, Institute of Solid State Physics, Chinese Academy of Sciences, Hefei 230031, P. R. China. E-mail: gzhwang@issp.ac.cn.

<sup>b</sup> Centre for Clean Environment and Energy, Gold Coast Campus, Griffith University, Queensland 4222, Australia. E-mail: h.zhao@griffith.edu.au.

**Table S1.** Major cation concentrations, dissolved organic carbon (DOC) and pH value of the DongPu Reservoir water and Nanfei River water.

| Measured parameters                    | Water samples          |                    |
|----------------------------------------|------------------------|--------------------|
|                                        | DongPu Reservoir water | Nanfei River water |
| [K <sup>+</sup> ]/mg L <sup>-1</sup>   | 2.48±0.02              | 17.90±0.07         |
| [Ca <sup>2+</sup> ]/mg L <sup>-1</sup> | 16.23±0.11             | 37.72±0.12         |
| [Na <sup>+</sup> ]/mg L <sup>-1</sup>  | 9.61±0.07              | 63.88±0.60         |
| [Mg <sup>2+</sup> ]/mg L <sup>-1</sup> | 5.21±0.02              | 9.01±0.02          |
| DOC                                    | 11.3±0.2               | 30.2±0.2           |
| pH                                     | 7.3±0.2                | 7.5±0.1            |

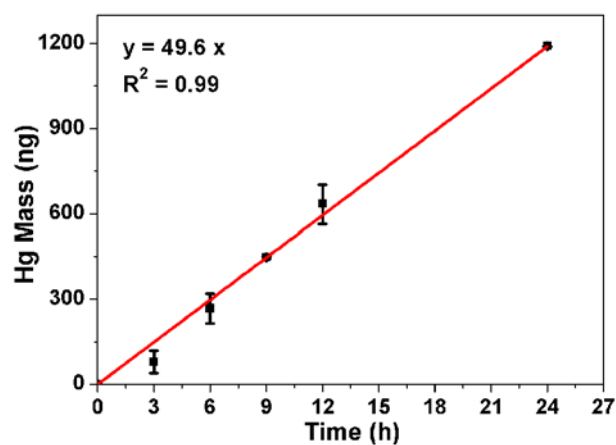

**Fig. S1**  $\text{Hg}^{2+}$  accumulated mass vs. deployment time using SH-CNPs-DGT in Dongpu Reservoir water spiked with  $\text{Hg}^{2+}$  ( $C_0=120 \mu\text{g L}^{-1}$ ). The red solid line is the linear regression used to calculate the diffusion coefficient. Mean values and ranges (bars) of triplicate measurements are given.
